# Supplementary material for: Improving the Quality of Education in Water Resources Engineering: A Hybrid Fuzzy-AHP-TOPSIS Method
Source: Copernicus journal article supplement (doi:10.5194/gc-2022-16), 2023-03-15
Supplement: Supplementary file 1 [file gc-2022-16-supplement.pdf]

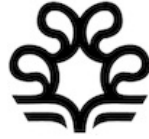

Faculty of Psychology and Educational Sciences

### Research Ethics Committees Certificate

|                         |                                                                                                                                                                                                                                                                                                                                                                                                                                                                                                                                                                                                                                   |                |            |
|-------------------------|-----------------------------------------------------------------------------------------------------------------------------------------------------------------------------------------------------------------------------------------------------------------------------------------------------------------------------------------------------------------------------------------------------------------------------------------------------------------------------------------------------------------------------------------------------------------------------------------------------------------------------------|----------------|------------|
| Approval ID:            | IR.US.PSYEDU.REC.1401.003                                                                                                                                                                                                                                                                                                                                                                                                                                                                                                                                                                                                         | Approval Date: | 2022-12-24 |
| Evaluated by:           | Research Ethics Committees of Faculty of Psychology and Educational Sciences                                                                                                                                                                                                                                                                                                                                                                                                                                                                                                                                                      |                |            |
| Status:                 | Approved                                                                                                                                                                                                                                                                                                                                                                                                                                                                                                                                                                                                                          |                |            |
| Approval Statement:     | The project was found to be in accordance to the ethical principles and the national norms and standards for conducting Medical Research in Iran.<br>Notice:<br><ol style="list-style-type: none"><li>1. Although the proposal has been approved by the Biomedical Research Ethics Committee, meeting the professional and legal requirements is the sole responsibility of the PI and other project collaborators.</li><li>2. This certificate is reliant on the proposal/documents received by this committee on 2022-12-24. The committee must be notified by the PI as soon as the proposal/documents are modified.</li></ol> |                |            |
| Proposal Title:         | Improving the Quality of Education in Water Resources Engineering: A Hybrid Fuzzy-AHP-TOPSIS Method                                                                                                                                                                                                                                                                                                                                                                                                                                                                                                                               |                |            |
| Principal Investigator: | Name: hamidifar<br>Email: hhamidi64@yahoo.com                                                                                                                                                                                                                                                                                                                                                                                                                                                                                                                                                                                     |                |            |

  
Dr. Nurallah Mohammadi  
Committee Director

Faculty of Psychology and Educational Sciences

  
Dr. Maryam Koushkie Jahromi  
Committee Secretary

Faculty of Psychology and Educational Sciences
